# Supplementary material for: Partial Peptide of α-Synuclein Modified with Small-Molecule Inhibitors Specifically Inhibits Amyloid Fibrillation of α-Synuclein
Source: Int J Mol Sci. 2013 Jan 28;14(2):2590–600. doi: 10.3390/ijms14022590 (PMC3588004; doi:10.3390/ijms14022590)

## Supplementary Information

**Figure S1.** Total ion chromatogram of the proteolytic-digested  $\alpha$ -synuclein partial peptide in the LC/MS. The peak 3 and 4 correspond to the Sp-7 fraction, which has inhibitory activity against  $\alpha$ -synuclein fibril formation.

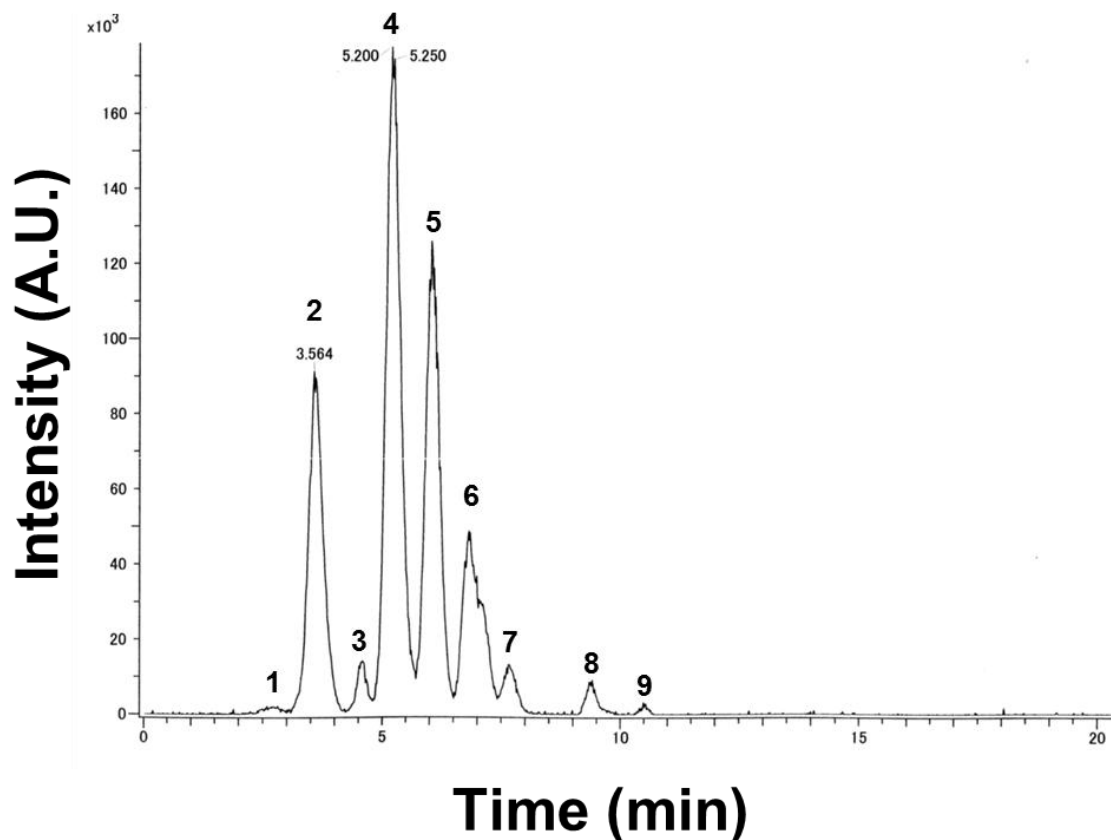

**Figure S2.** The size exclusion chromatography of PQQ-modified  $\alpha$ -Syn<sub>3-13</sub> (A), PQQ-modified  $\alpha$ -Syn<sub>21-28</sub> (B) and PQQ-modified  $\alpha$ -Syn<sub>36-46</sub> (C). In all case, the first peaks that eluted at 10 to 20 ml were corrected.

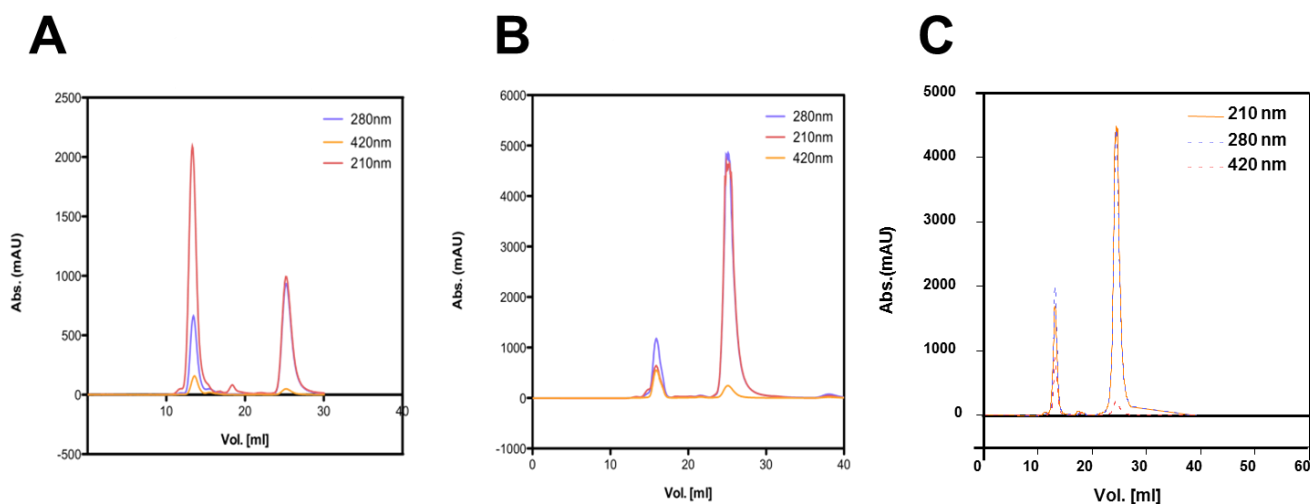

**Figure S3.** MALDI-TOF MS analysis of  $\alpha$ -Syn<sub>36-46</sub>-PQQ. Three peaks at a molecular mass of 1180, 1492, and 2984 correspond to unmodified peptide, one peptide modified with one PQQ and two peptides modified with two PQQ, respectively.

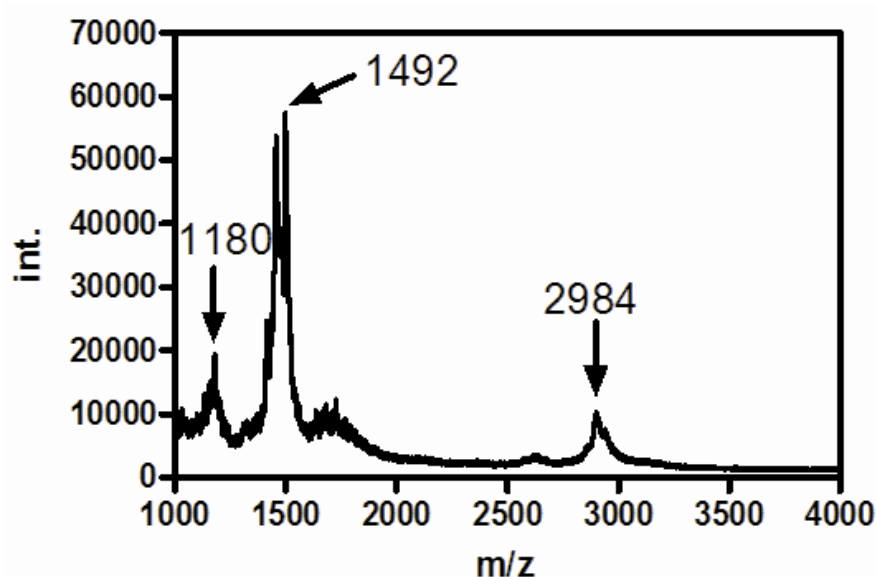

**Figure S4.** The size exclusion chromatography of Baicalein-modified  $\alpha$ -Syn<sub>36-46</sub> (A) and EGCG-modified  $\alpha$ -Syn<sub>36-46</sub> (B). In the both cases, 2 peaks were observed when the elution was monitored by determining the absorbance at 280 nm. The first and second peaks are highlighted in green and yellow, respectively.

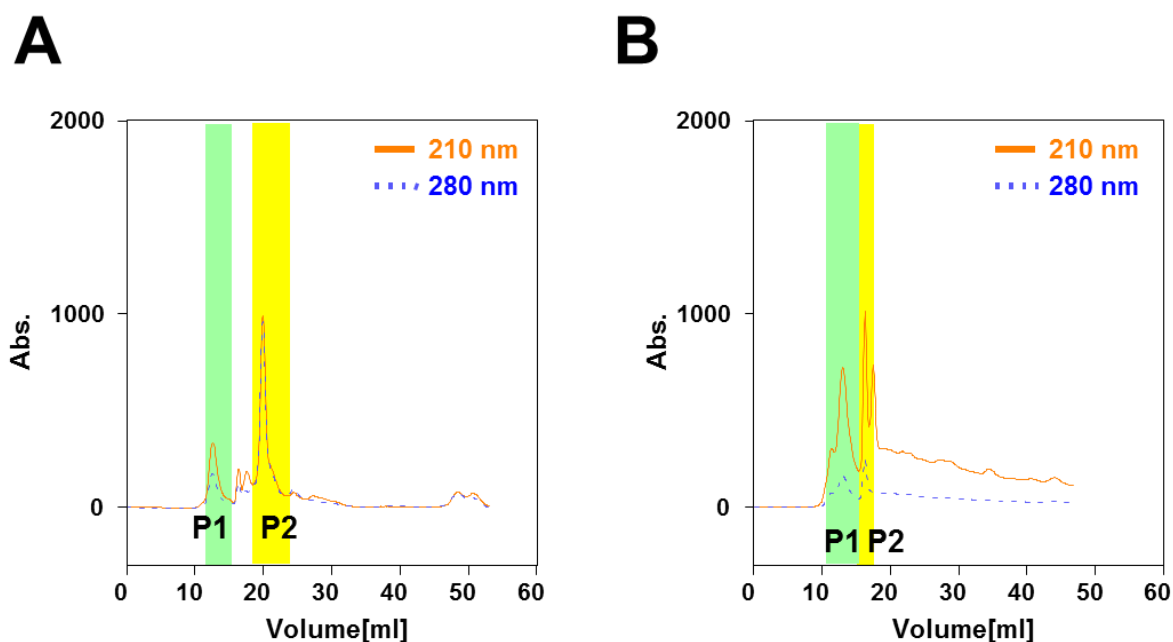

Supplement: Supplementary File 1 — Supplementary Information (PDF, 174 KB) [file ijms-14-02590-s001.pdf]
